# Supplementary material for: Overexpression of PGC‐1α in aging muscle enhances a subset of young‐like molecular patterns
Source: PubMed Central journal article supplement (PMC5847875; doi:10.1111/acel.12707), 2018-02-10
Supplement: ACEL-17-e12707-s002.pdf [file ACEL-17-e12707-s002.pdf]

**Supplemental Table ST1. Mice used for molecular studies.**

| <b>Mouse ID</b> | <b>Sex</b> | <b>Genotype</b> | <b>Age</b> |
|-----------------|------------|-----------------|------------|
| 6Bp3m18         | F          | PGC-1 $\alpha$  | 868        |
| 6Bp3m19         | F          | PGC-1 $\alpha$  | 868        |
| 122210m19       | M          | PGC-1 $\alpha$  | 755        |
| 010611m2        | M          | PGC-1 $\alpha$  | 1008       |
| 122810m6        | F          | CTRL            | 1017       |
| 6Bf3m18         | M          | CTRL            | 889        |
| 6Bf3m17         | M          | CTRL            | 889        |
| 6Bf3m19         | M          | CTRL            | 889        |
| 122810m3        | M          | CTRL            | 1017       |
